# Supplementary material for: Transcriptomic Characterization of the Novel Avian-Origin Influenza A (H7N9) Virus: Specific Host Response and Responses Intermediate between Avian (H5N1 and H7N7) and Human (H3N2) Viruses and Implications for Treatment Options
Source: PubMed Central journal article supplement — mBio. 2014 Feb 4;5(1):e01102-13. doi: 10.1128/mBio.01102-13 (PMC3950506; doi:10.1128/mbio.01102-13), 2014-02-04
Supplement: mbo001141729so2.pdf [file mbo001141729so2.pdf]

# Figure S1

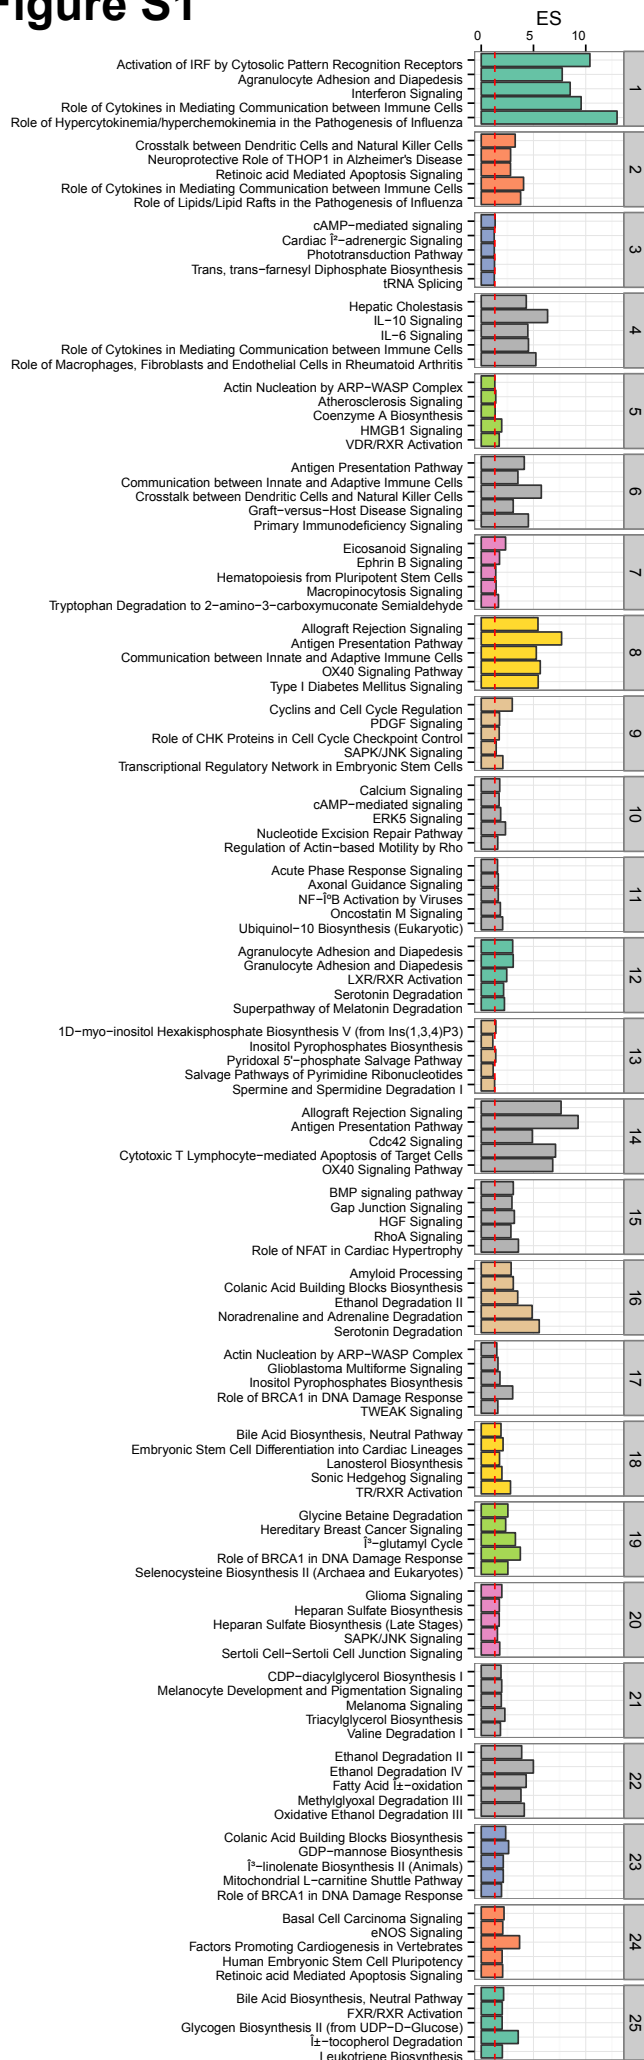

## Clusters

- Genes DE by all IAV
- Genes DE by all IAV except H7N9
- Genes DE by all avian IAV
- Genes DE by all avian IAV except H7N9
- Genes DE by H7N9 and H5N1
- Genes DE only by human IAV
- Genes specific to H7N9
- Other patterns
