# Supplementary figures and images for: Transcriptomic Characterization of the Novel Avian-Origin Influenza A (H7N9) Virus: Specific Host Response and Responses Intermediate between Avian (H5N1 and H7N7) and Human (H3N2) Viruses and Implications for Treatment Options
Source: PubMed Central journal article supplement — mBio. 2014 Feb 4;5(1):e01102-13. doi: 10.1128/mBio.01102-13 (PMC3950506; doi:10.1128/mbio.01102-13), 2014-02-04

# Figure S3

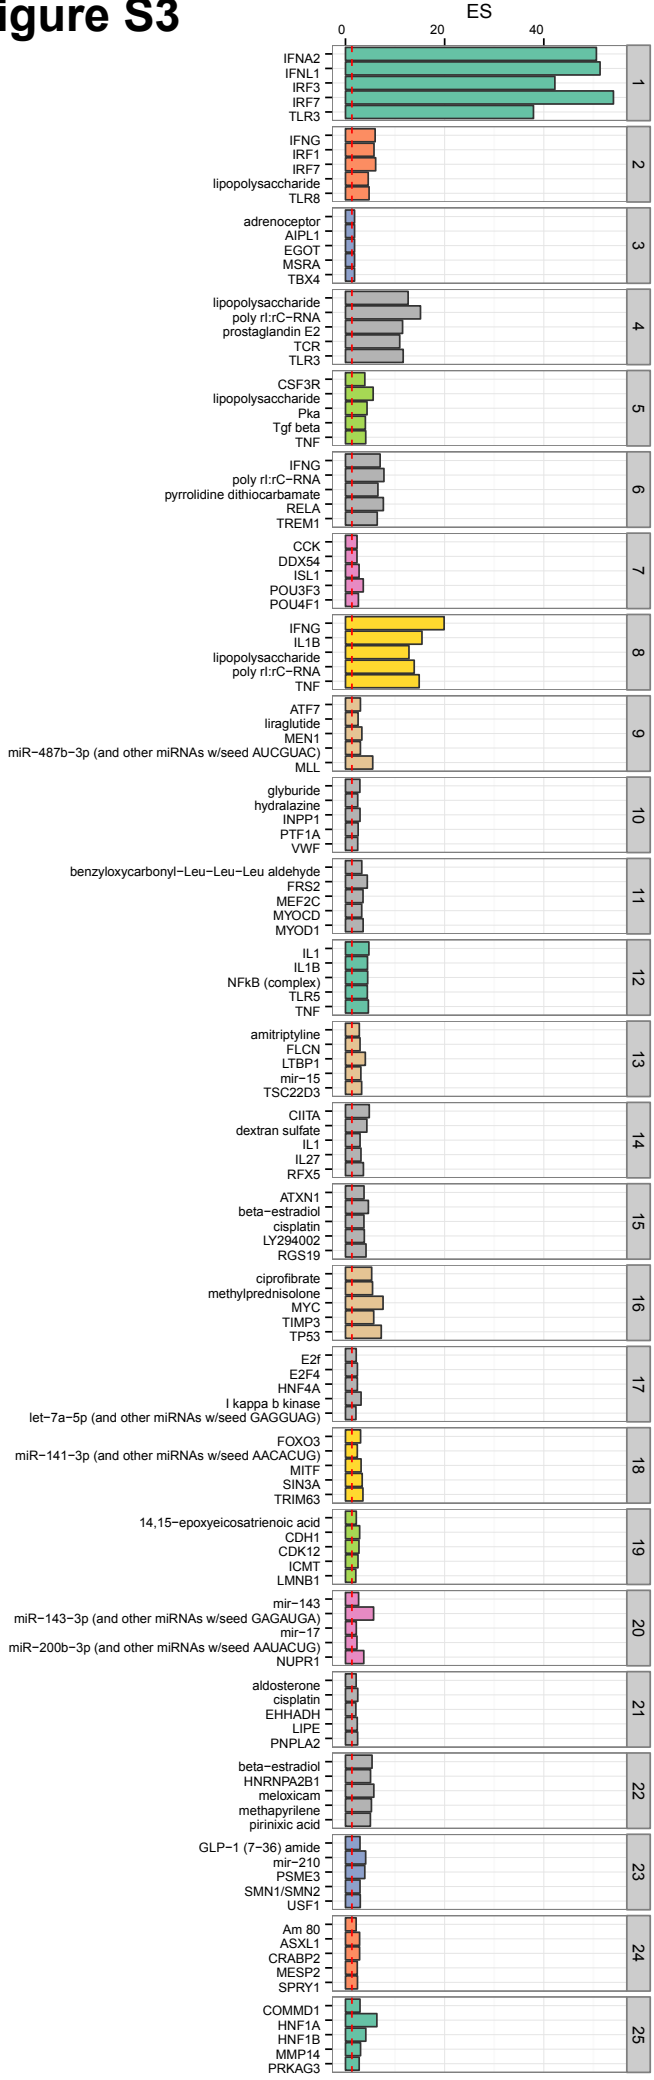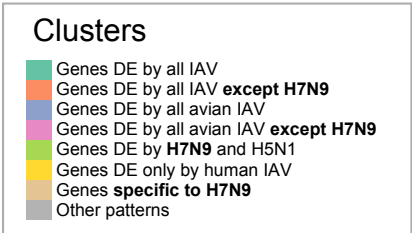

Supplement: mbo001141729so4.pdf [file mbo001141729so4.pdf]

# Figure S4

## A

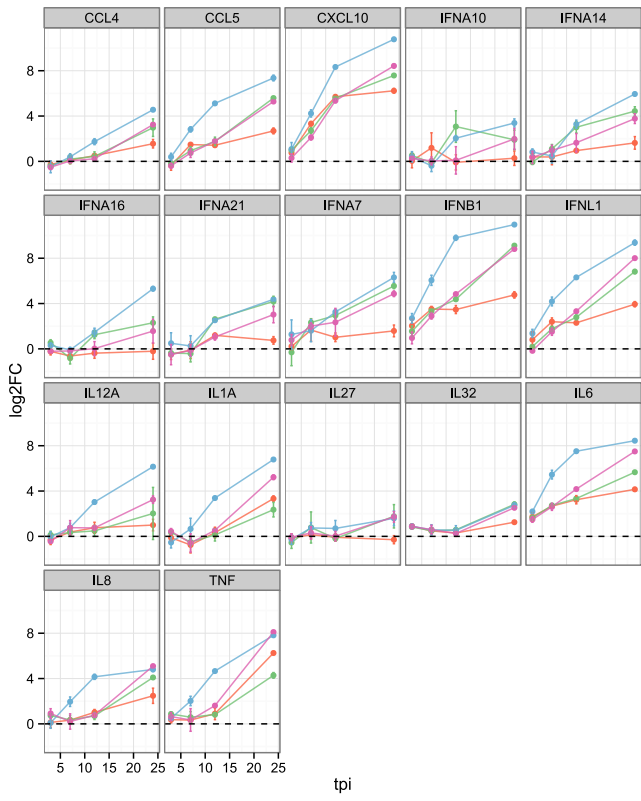

## B

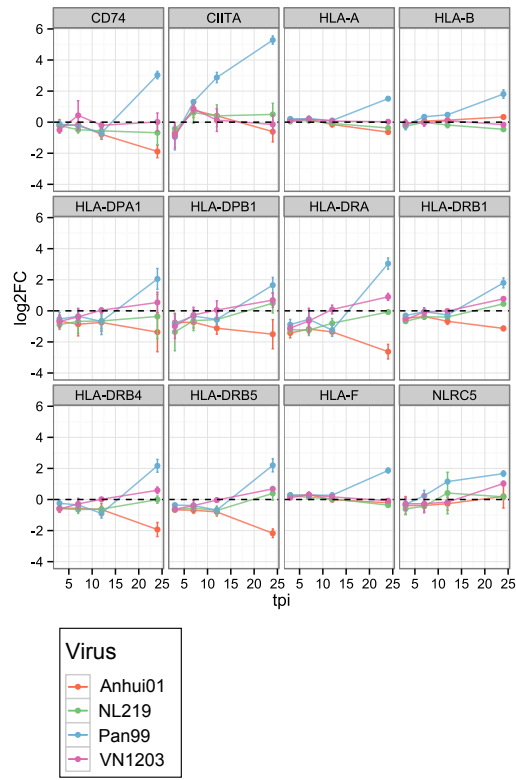

## C

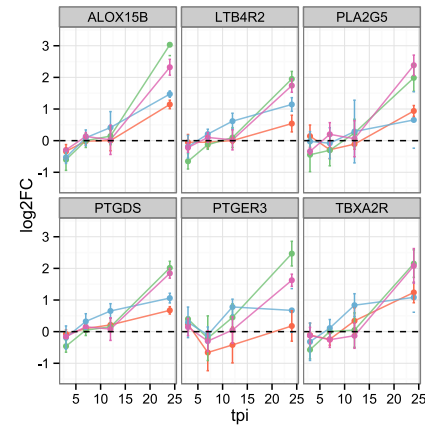

Supplement: mbo001141729so5.pdf [file mbo001141729so5.pdf]

**Figure S6**

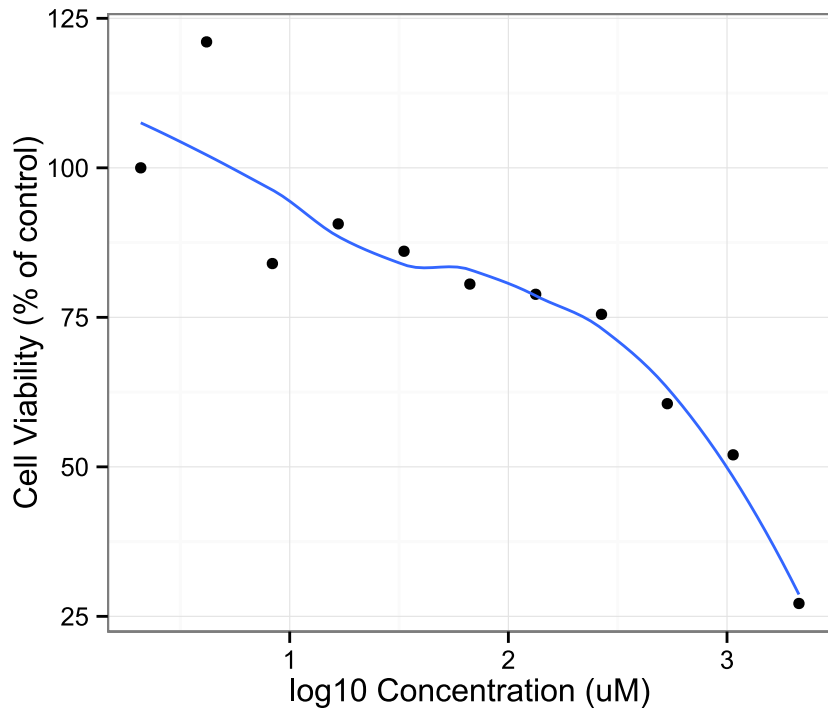

Supplement: mbo001141729so7.pdf [file mbo001141729so7.pdf]
